# Supplementary material for: Magnetism of elemental two-dimensional metals
Source: Royal Society of Chemistry journal article supplement (doi:10.1039/d1tc00438g), 2021-01-01
Supplement: d1tc00438g1.pdf [file d1tc00438g1.pdf]

Supporting Information of:

## **Magnetic monolayer of Elemental 2D Metals**

Yinti Ren,<sup>1,2</sup> Liang Hu,<sup>2</sup> Yangfan Shao,<sup>2</sup> Yijian Hu,<sup>2</sup> Li Huang,<sup>2</sup> and Xingqiang Shi<sup>3,\*</sup>

<sup>1</sup>Harbin Institute of Technology, Harbin 150080, China

<sup>2</sup>Department of Physics, Southern University of Science and Technology, Shenzhen 518055, China

<sup>3</sup>Hebei Key Laboratory of Optic-Electronic Information and Materials, College of Physics Science and Technology, Hebei University, Baoding 071002, China

\*E-mail: [shixq20hbu@hbu.edu.cn](mailto:shixq20hbu@hbu.edu.cn)

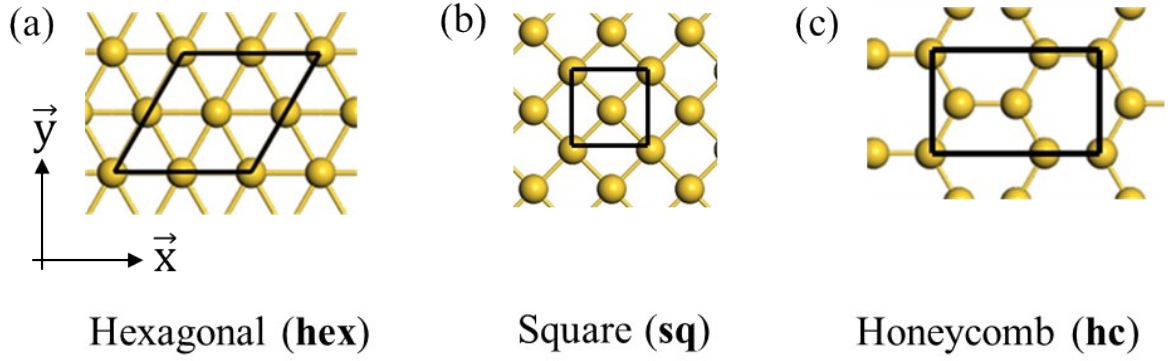

**FIG. S1. The three 2D lattice structures.** Yellow spheres denote metal atoms; black lines indicate the supercells constructed to consider different magnetic configurations. Note that a supercell is needed to consider the anti-ferromagnetic configurations.

**Table S1.** Some 2D metals and their structure types, for both theoretical and experimental works.

| Elements                                      | Structures  | Experiment/Theory                  |
|-----------------------------------------------|-------------|------------------------------------|
| Fe (in graphene nanopores)                    | sq          | Experiment <sup>1</sup>            |
| Mo (in monolayer MoSe <sub>2</sub> nanopores) | hex         | Experiment <sup>2</sup>            |
| Sn (on Cu(111))                               | hc          | Experiment <sup>3</sup>            |
| Au (in bulk Au-Ag alloy nanopores)            | hex         | Experiment <sup>4</sup>            |
| Pb/In (on Si(111))                            | hex/sq      | Experiment <sup>5</sup>            |
| Hf (on Ir(111))                               | hc          | Experiment <sup>6</sup>            |
| Cr                                            | hex, sq, hc | Experiment and Theory <sup>7</sup> |
| Au                                            | hc          | Theory <sup>8</sup>                |
| Ag                                            | hex, sq, hc | Theory <sup>9</sup>                |

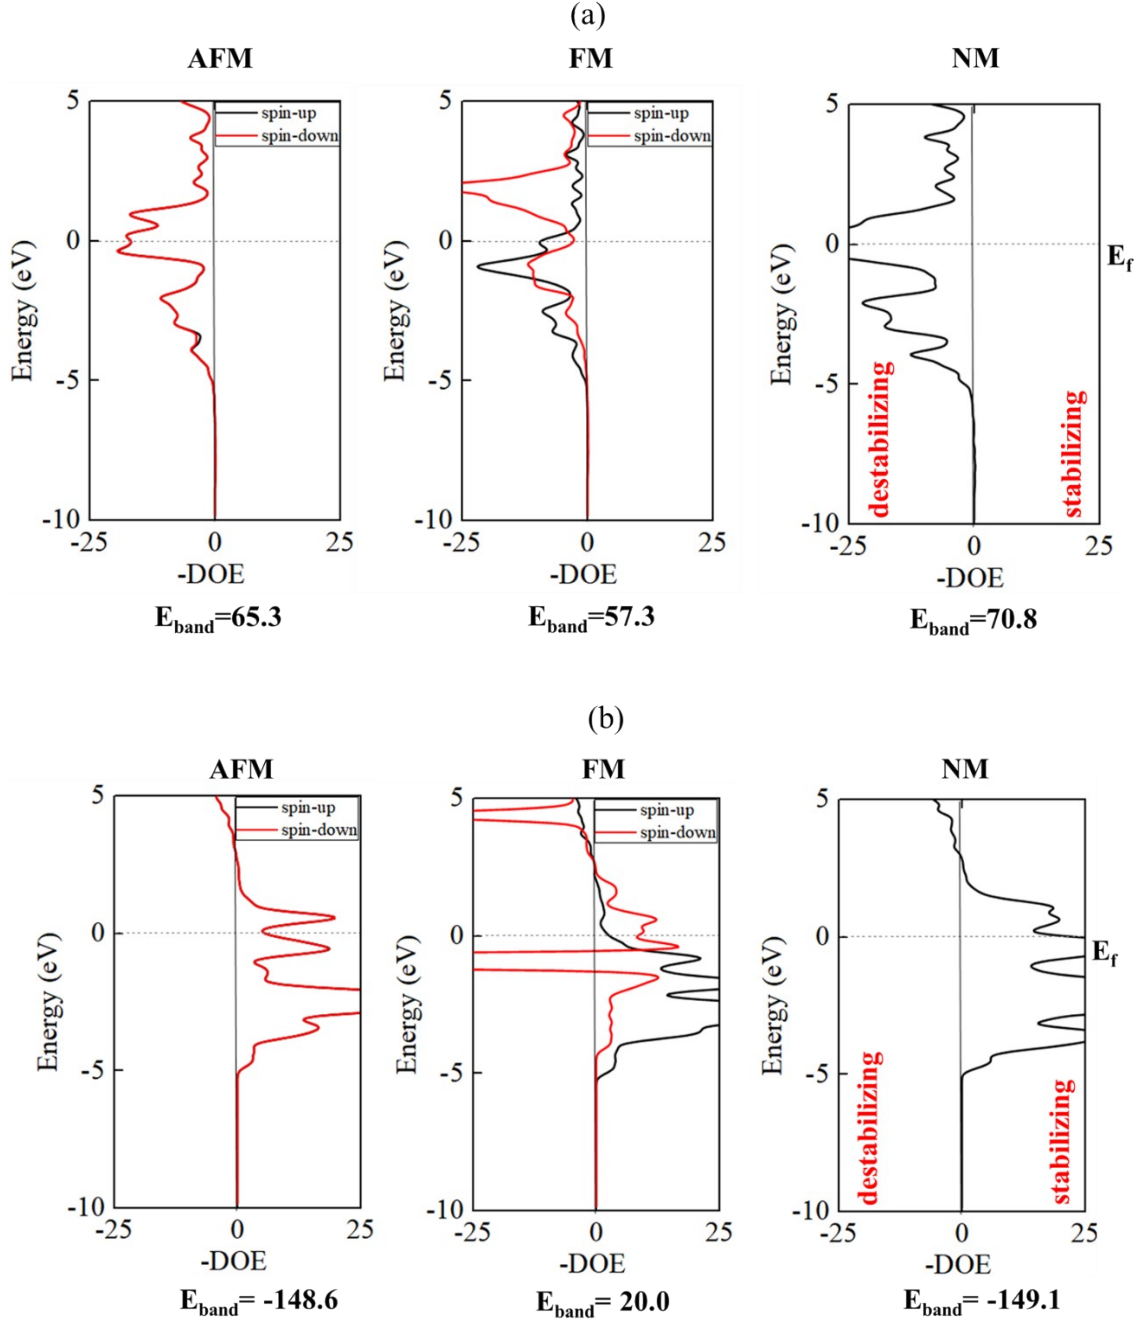

**FIG. S2.** DOE analysis of (a) bulk Fe and (b) hc Fe in three magnetic structures (nonmagnetic, FM, AFM). The fermi energy was set to zero ( $E_f$ ).  $E_{\text{band}}$  represent the energy integral of the DOE in a energy range (Eq. 2 in the main text).

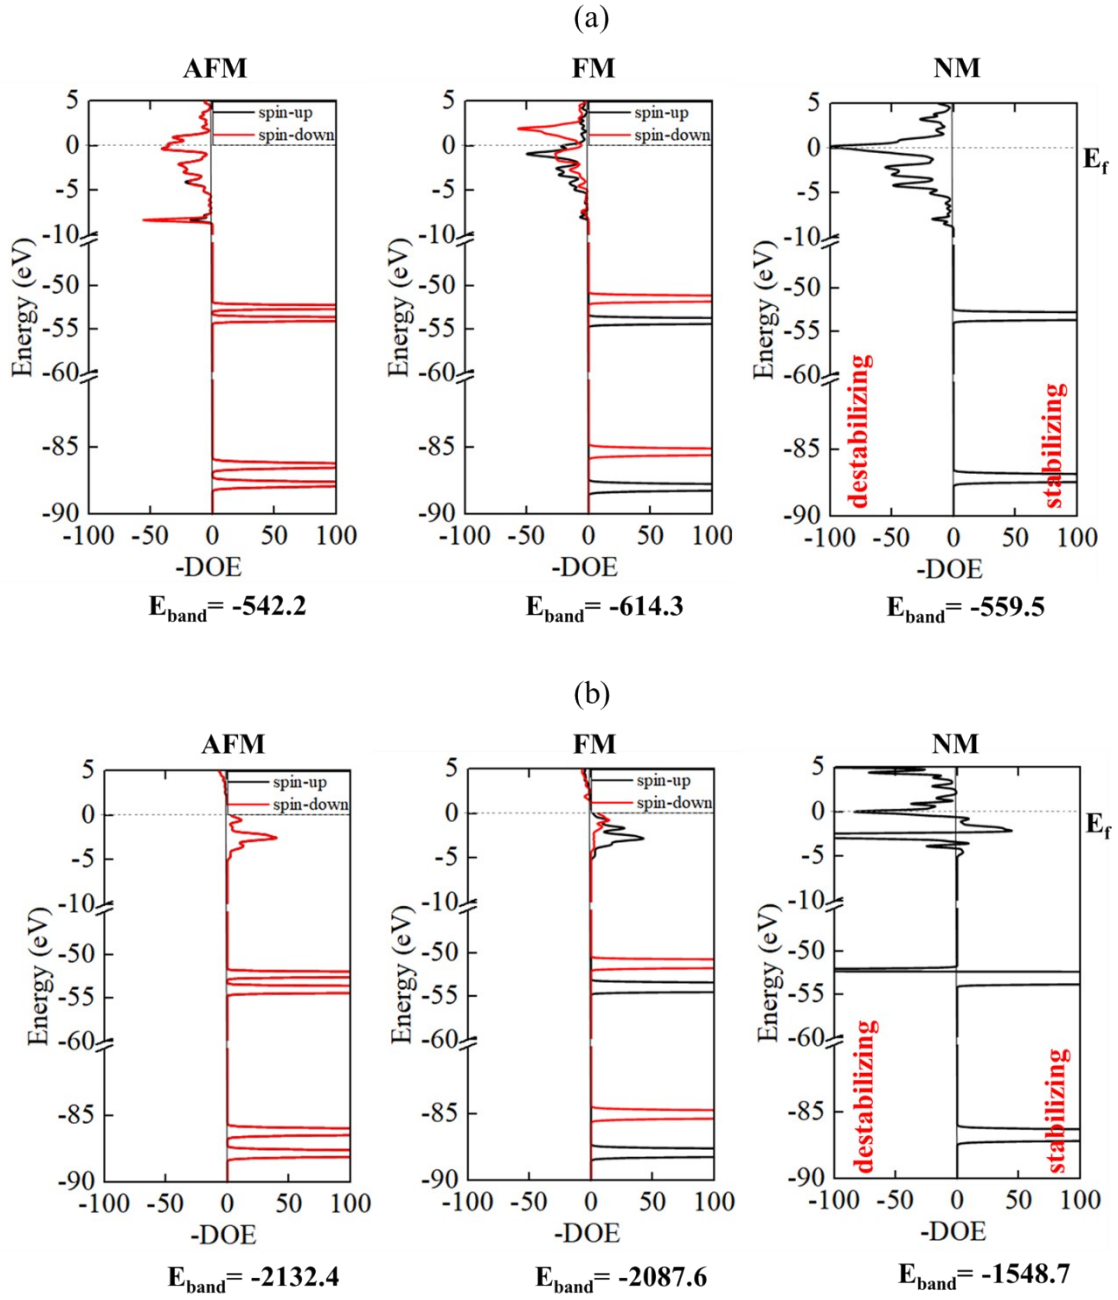

**FIG. S3.** Extended energy-range DOE analysis of (a) bulk Fe and (b) hc Fe in the three magnetic structures. The Fermi energy ( $E_F$ ) was set to zero.  $E_{\text{band}}$  represent the energy integral of the DOE in a energy range including semi-core states.

## Reference

1. Zhao, J.; Deng, Q.; Bachmatiuk, A.; Sandeep, G.; Popov, A.; Eckert, J.; Rummeli, M. H. *Science* **2014**, 343, (6176), 1228.
2. Zhao, X.; Dan, J.; Chen, J.; Ding, Z.; Zhou, W.; Loh, K. P.; Pennycook, S. J. *Advanced Materials* **2018**, 30, (23), 1707281.
3. Deng, J.; Xia, B.; Ma, X.; Chen, H.; Shan, H.; Zhai, X.; Li, B.; Zhao, A.; Xu, Y.; Duan, W.; Zhang, S.-C.; Wang, B.; Hou, J. G. *Nature Materials* **2018**, 17, (12), 1081-1086.
4. Wang, X.; Wang, C.; Chen, C.; Duan, H.; Du, K. *Nano Letters* **2019**, 19, (7), 4560-4566.
5. Zhang, T.; Cheng, P.; Li, W.-J.; Sun, Y.-J.; Wang, G.; Zhu, X.-G.; He, K.; Wang, L.; Ma, X.; Chen, X.; Wang, Y.; Liu, Y.; Lin, H.-Q.; Jia, J.-F.; Xue, Q.-K. *Nature Physics* **2010**, 6, 104.
6. Li, L.; Wang, Y.; Xie, S.; Li, X.-B.; Wang, Y.-Q.; Wu, R.; Sun, H.; Zhang, S.; Gao, H.-J. *Nano Letters* **2013**, 13, (10), 4671-4674.
7. Ta, H. Q.; Yang, Q. X.; Liu, S.; Bachmatiuk, A.; Mendes, R. G.; Gemming, T.; Liu, Y.; Liu, L.; Tokarska, K.; Patel, R. B.; Choi, J.-H.; Rummeli, M. H. *Nano Letters* **2020**, 20, (6), 4354-4361.
8. Liu, N.; Jin, S.; Guo, L.; Wang, G.; Shao, H.; Chen, L.; Chen, X. *Physical Review B* **2017**, 95, (15), 155311.
9. Yang, L.-M.; Frauenheim, T.; Ganz, E. *Physical Chemistry Chemical Physics* **2015**, 17, (30), 19695-19699.
